# Supplementary material for: Mineralization of anionic dyes over visible light responsive Cd(x)Zn(y)S–Nb2O5 heterostructured photocatalysts
Source: Royal Society of Chemistry journal article supplement (doi:10.1039/c6ra06023d), 2016-01-01
Supplement: c6ra06023d1.pdf [file c6ra06023d1.pdf]

### Electronic Supplementary Information

## Mineralization of anionic dyes over visible light responsive Cd(x)Zn(y)S-Nb<sub>2</sub>O<sub>5</sub> heterostructured photocatalysts

Sachin G. Ghugal<sup>a</sup>, Suresh S. Umare<sup>\*a</sup>, Rajamma Sasikala<sup>b\*\*</sup>

<sup>a</sup>Department of Chemistry, Visvesvaraya National Institute of Technology, Nagpur 440 010, India.

<sup>b</sup>Chemistry Division, Bhabha Atomic Research Centre Trombay, Mumbai - 400 085, India.

\* Corresponding author. Tel No. +91 22 25590289; Fax: +91 22 25505151.

\*\* Corresponding author. Tel No. +91 712 2801316; Fax: +91 712 2223230.

E-mail addresses: [ssumare@chm.vnit.ac.in](mailto:ssumare@chm.vnit.ac.in) (S. S. Umare), [sasikala@barc.gov.in](mailto:sasikala@barc.gov.in) (R. Sasikala)

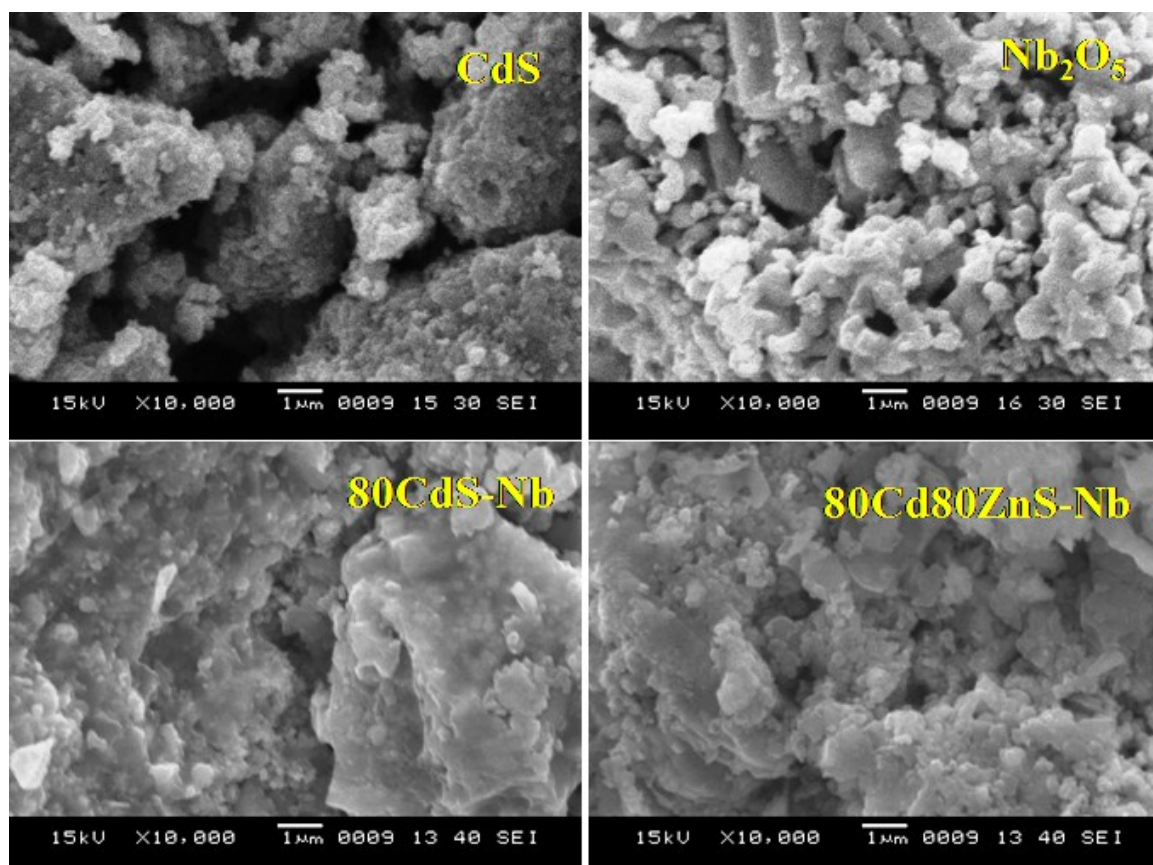

Fig. S1. SEM images of CdS, Nb<sub>2</sub>O<sub>5</sub>, 80CdS-Nb and 80Cd80ZnS-Nb.

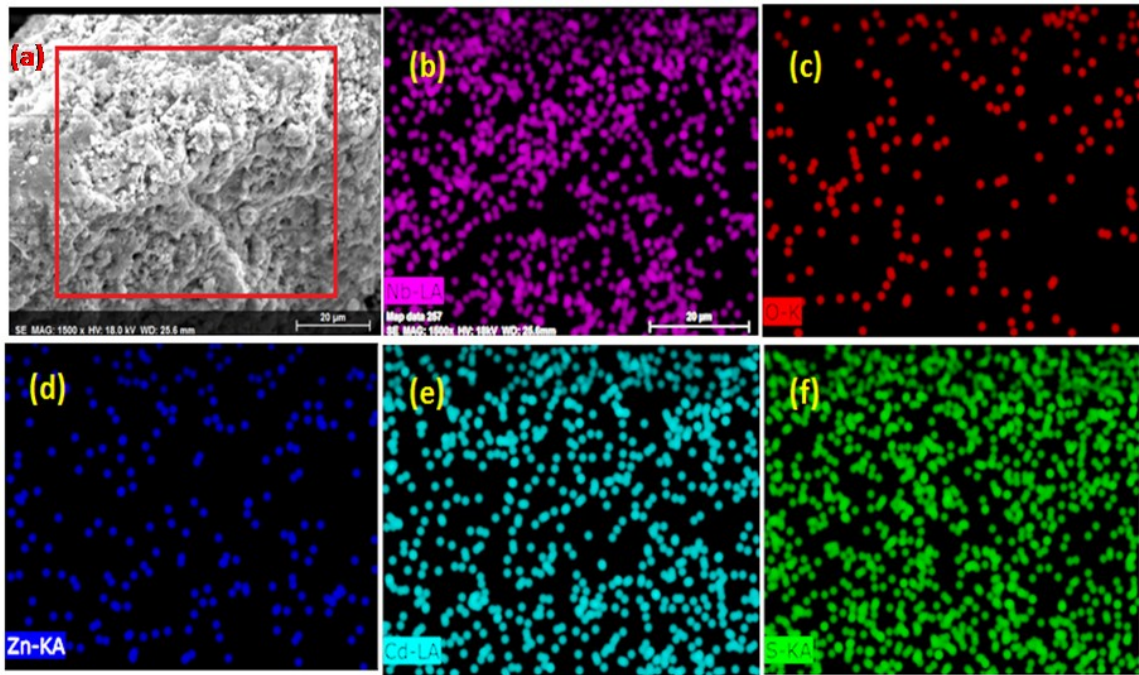

Fig: S2. (a) SEM image and EDS mapping of (b) Nb, (c) O, (d) Zn, (e) Cd and (f) S in 80Cd80ZnS-Nb composite.

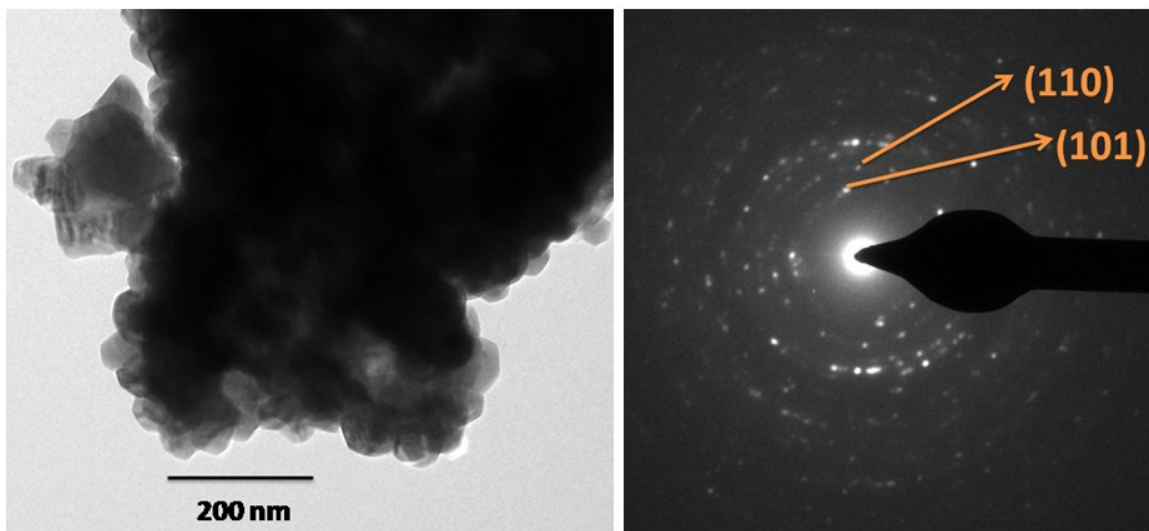

Fig. S3. TEM image and SAED pattern of CdS.

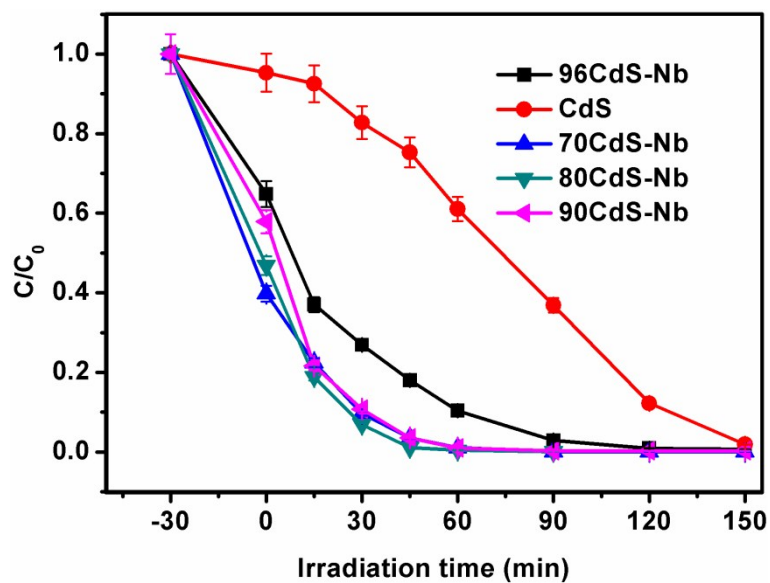

Fig.S4 Effect of CdS loading on  $Nb_2O_5$  (weight %) for photocatalytic degradation of AV 7 (Conc. 50 ppm).

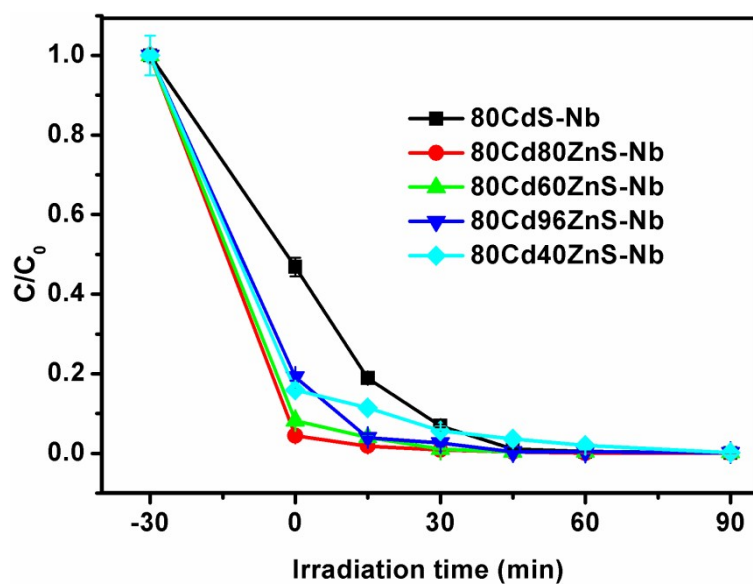

Fig. S5 Effect of Zn doping (weight %) in 80CdS-Nb for photocatalytic degradation of AV 7 (Conc. 50 ppm).

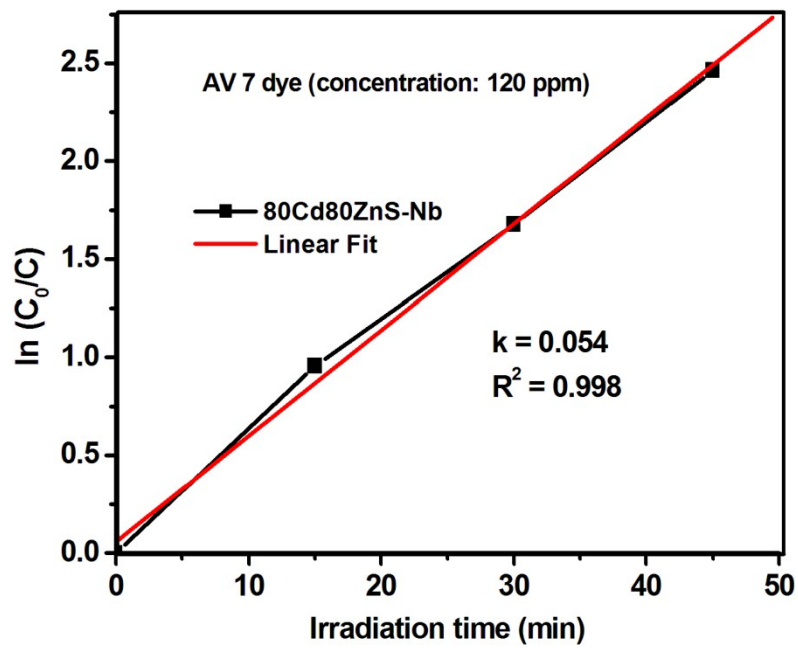

Fig.S6 Plot of  $\ln(C_0/C)$  as a function of irradiation time (min) for photocatalysis of AV 7 (120 ppm) solution containing 80Cd80ZnS-Nb.

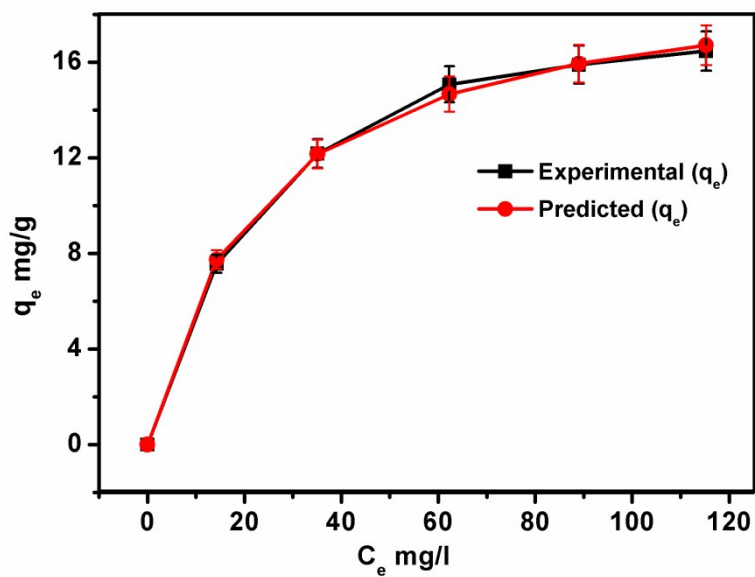

(A)

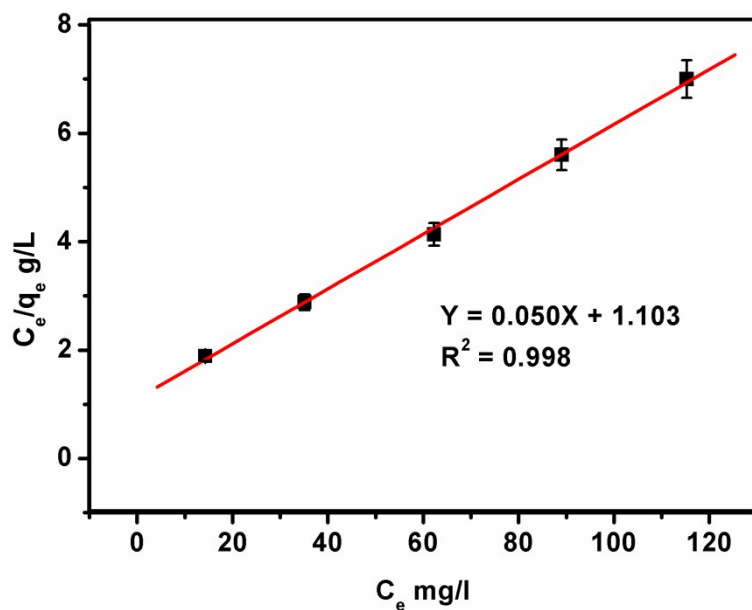

(B)

Fig.S7. Adsorption isotherm (A) and the corresponding Langmuir plots (B) of AV 7 on 80Cd80ZnS-Nb samples.

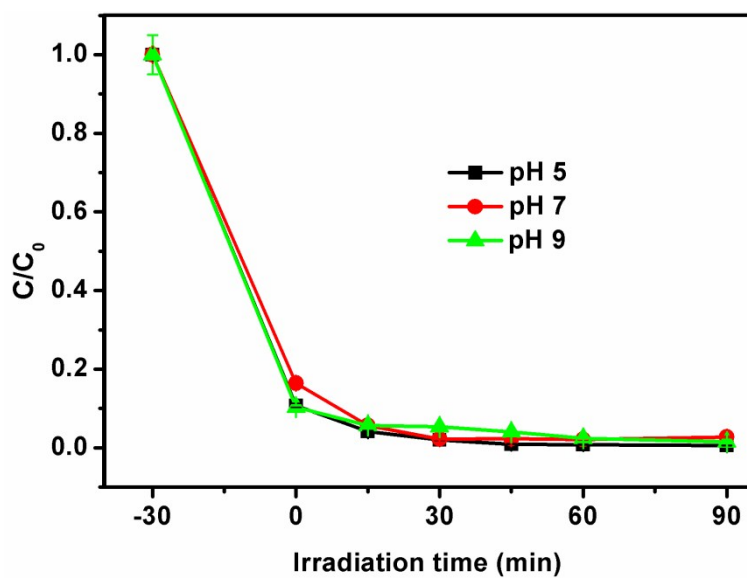

Fig.S8 Effect of pH on the photocatalytic degradation of AV 7 (120 ppm) by 80Cd80ZnS-Nb.

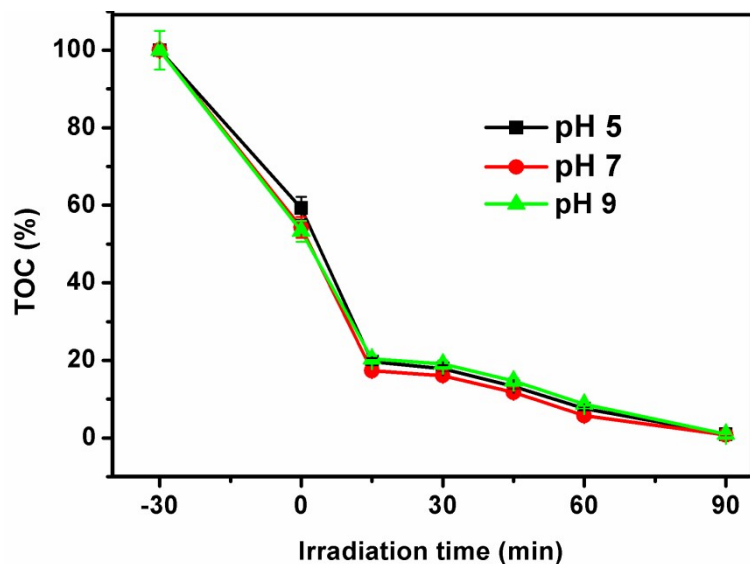

Fig.S9 Total organic carbon (TOC %) at different pH during photocatalytic degradation reaction of AV 7 by 80Cd80ZnS-Nb.

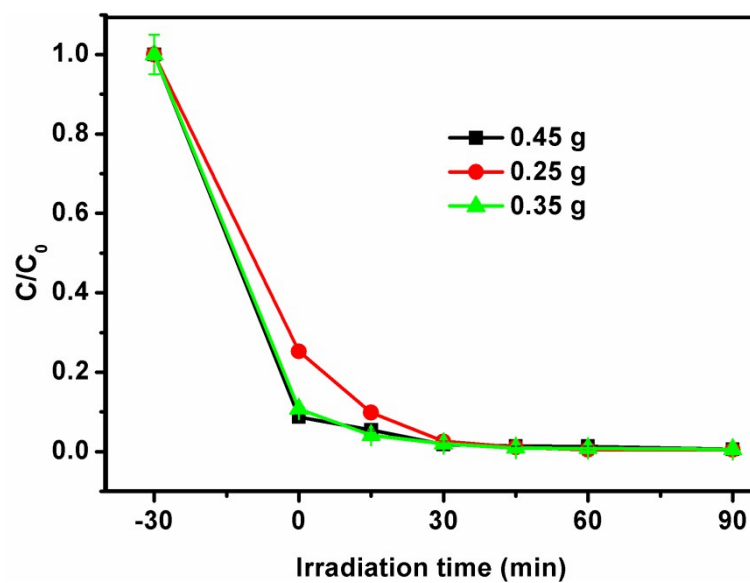

Fig.S10 Effect of catalysts loading on the photocatalytic degradation of AV 7 (120 ppm) by 80Cd80ZnS-Nb.

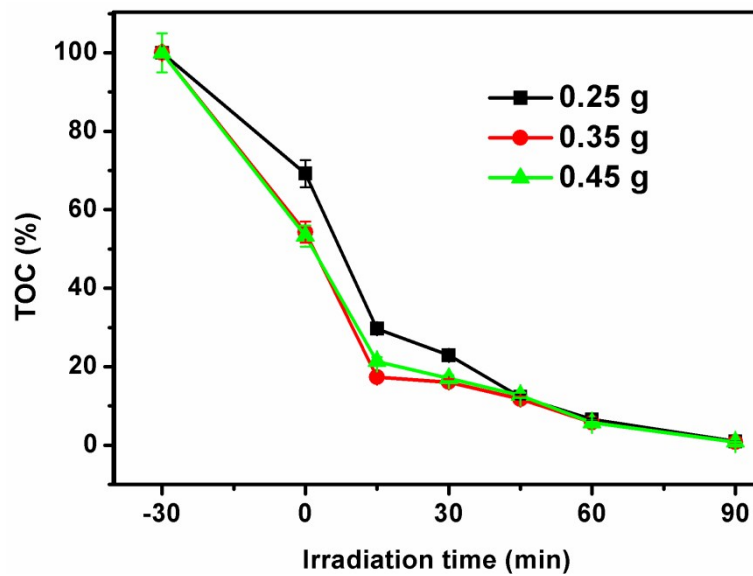

Fig.S11 Total organic carbon (TOC %) at different amount of loading during photocatalytic degradation reaction of AV 7 by 80Cd80ZnS-Nb.

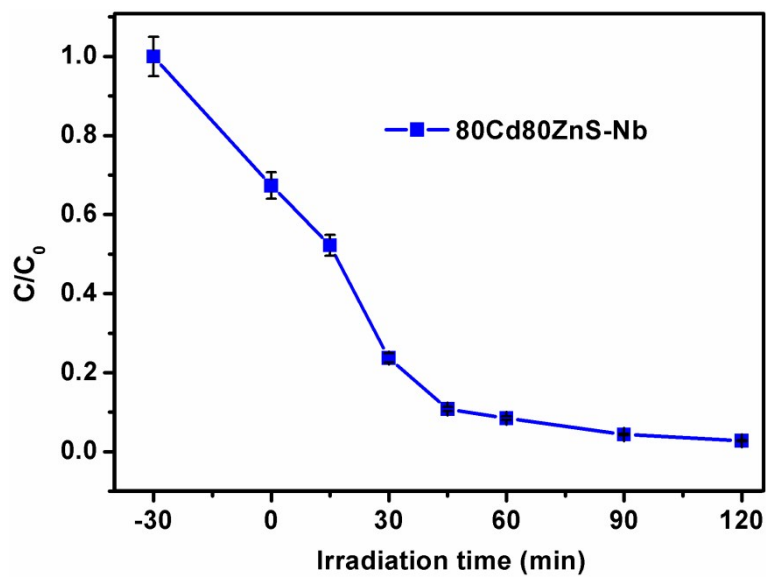

Fig.S12 Photocatalytic performances of 80Cd80ZnS-Nb for 200 ppm AV 7 dye.

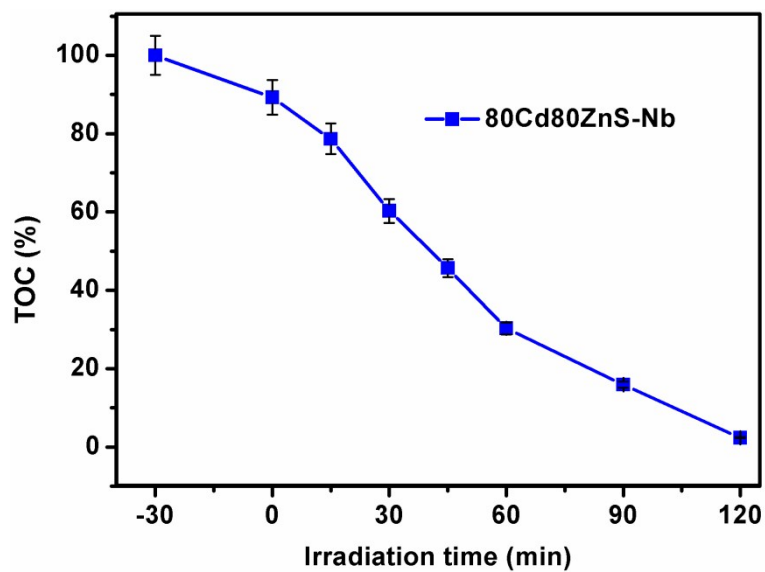

Fig.S13 Total organic carbon (TOC %) during photocatalytic degradation reaction of AV 7 (200 ppm) by 80Cd80ZnS-Nb.
